# Supplementary material for: Genomic Steppe ancestry in skeletons from the Neolithic Single Grave Culture in Denmark
Source: PLoS One. 2021 Jan 14;16(1):e0244872. doi: 10.1371/journal.pone.0244872 (PMC7808695; doi:10.1371/journal.pone.0244872)
Supplement: S3 Table — (XLSX) [file pone.0244872.s005.xlsx]

## Sheet: Gjerrild_Table S3
S3 Table. Ancient comparative datasets analyzed in this study.
Sample ID	Group (as seen in Figure 4)	Country	Reference	Title	doi
EKA1	CordedWare_EBA	Estonia	Malmström_2019_ProcRSocB	The genomic ancestry of the Scandinavian Battle Axe Culture people and their relation to the broader Corded Ware horizon	https://doi.org/10.1098/rspb.2019.1528
RISE00	CordedWare_EBA	Estonia	Allentoft_2015_Nature	Population genomics of Bronze Age Eurasia	10.1038/nature14507
RISE109	Unetice_EBA	Poland	Allentoft_2015_Nature	Population genomics of Bronze Age Eurasia	10.1038/nature14507
RISE150	Unetice_EBA	Poland	Allentoft_2015_Nature	Population genomics of Bronze Age Eurasia	10.1038/nature14507
RISE154	Unetice_EBA	Poland	Allentoft_2015_Nature	Population genomics of Bronze Age Eurasia	10.1038/nature14507
RISE175	Sweden_LNBA	Sweden	Allentoft_2015_Nature	Population genomics of Bronze Age Eurasia	10.1038/nature14507
RISE240	Yamnaya_EBA	Russia	Allentoft_2015_Nature	Population genomics of Bronze Age Eurasia	10.1038/nature14507
RISE247	Hungary_BA	Hungary	Allentoft_2015_Nature	Population genomics of Bronze Age Eurasia	10.1038/nature14507
RISE276	Denmark_LNBA	Denmark	Allentoft_2015_Nature	Population genomics of Bronze Age Eurasia	10.1038/nature14507
RISE349	Hungary_BA	Hungary	Allentoft_2015_Nature	Population genomics of Bronze Age Eurasia	10.1038/nature14507
RISE371	Hungary_BA	Hungary	Allentoft_2015_Nature	Population genomics of Bronze Age Eurasia	10.1038/nature14507
RISE373	Hungary_BA	Hungary	Allentoft_2015_Nature	Population genomics of Bronze Age Eurasia	10.1038/nature14507
RISE374	Hungary_BA	Hungary	Allentoft_2015_Nature	Population genomics of Bronze Age Eurasia	10.1038/nature14507
RISE386	Sintashta_EBA	Russia	Allentoft_2015_Nature	Population genomics of Bronze Age Eurasia	10.1038/nature14507
RISE392	Sintashta_EBA	Russia	Allentoft_2015_Nature	Population genomics of Bronze Age Eurasia	10.1038/nature14507
RISE394	Sintashta_EBA	Russia	Allentoft_2015_Nature	Population genomics of Bronze Age Eurasia	10.1038/nature14507
RISE395	Sintashta_EBA	Russia	Allentoft_2015_Nature	Population genomics of Bronze Age Eurasia	10.1038/nature14507
RISE396	Armenia_LBA	Armenia	Allentoft_2015_Nature	Population genomics of Bronze Age Eurasia	10.1038/nature14507
RISE397	Armenia_LBA	Armenia	Allentoft_2015_Nature	Population genomics of Bronze Age Eurasia	10.1038/nature14507
RISE407	Armenia_LBA	Armenia	Allentoft_2015_Nature	Population genomics of Bronze Age Eurasia	10.1038/nature14507
RISE408	Armenia_LBA	Armenia	Allentoft_2015_Nature	Population genomics of Bronze Age Eurasia	10.1038/nature14507
RISE412	Armenia_LBA	Armenia	Allentoft_2015_Nature	Population genomics of Bronze Age Eurasia	10.1038/nature14507
RISE423	Armenia_MBA	Armenia	Allentoft_2015_Nature	Population genomics of Bronze Age Eurasia	10.1038/nature14507
RISE431	CordedWare_EBA	Poland	Allentoft_2015_Nature	Population genomics of Bronze Age Eurasia	10.1038/nature14507
RISE434	CordedWare_EBA	Germany	Allentoft_2015_Nature	Population genomics of Bronze Age Eurasia	10.1038/nature14507
RISE435	CordedWare_EBA	Germany	Allentoft_2015_Nature	Population genomics of Bronze Age Eurasia	10.1038/nature14507
RISE446	CordedWare_EBA	Germany	Allentoft_2015_Nature	Population genomics of Bronze Age Eurasia	10.1038/nature14507
RISE47	Denmark_LNBA	Denmark	Allentoft_2015_Nature	Population genomics of Bronze Age Eurasia	10.1038/nature14507
RISE471	Germany_BA	Germany	Allentoft_2015_Nature	Population genomics of Bronze Age Eurasia	10.1038/nature14507
RISE479	Hungary_BA	Hungary	Allentoft_2015_Nature	Population genomics of Bronze Age Eurasia	10.1038/nature14507
RISE480	Hungary_BA	Hungary	Allentoft_2015_Nature	Population genomics of Bronze Age Eurasia	10.1038/nature14507
RISE483	Hungary_BA	Hungary	Allentoft_2015_Nature	Population genomics of Bronze Age Eurasia	10.1038/nature14507
RISE484	Hungary_BA	Hungary	Allentoft_2015_Nature	Population genomics of Bronze Age Eurasia	10.1038/nature14507
RISE486	Italy_CA	Italy	Allentoft_2015_Nature	Population genomics of Bronze Age Eurasia	10.1038/nature14507
RISE487	Italy_CA	Italy	Allentoft_2015_Nature	Population genomics of Bronze Age Eurasia	10.1038/nature14507
RISE489	Italy_CA	Italy	Allentoft_2015_Nature	Population genomics of Bronze Age Eurasia	10.1038/nature14507
RISE500	Andronovo_BA	Russia	Allentoft_2015_Nature	Population genomics of Bronze Age Eurasia	10.1038/nature14507
RISE503	Andronovo_BA	Russia	Allentoft_2015_Nature	Population genomics of Bronze Age Eurasia	10.1038/nature14507
RISE505	Andronovo_BA	Russia	Allentoft_2015_Nature	Population genomics of Bronze Age Eurasia	10.1038/nature14507
RISE507	Afanasievo_EBA	Russia	Allentoft_2015_Nature	Population genomics of Bronze Age Eurasia	10.1038/nature14507
RISE509	Afanasievo_EBA	Russia	Allentoft_2015_Nature	Population genomics of Bronze Age Eurasia	10.1038/nature14507
RISE510	Afanasievo_EBA	Russia	Allentoft_2015_Nature	Population genomics of Bronze Age Eurasia	10.1038/nature14507
RISE511	Afanasievo_EBA	Russia	Allentoft_2015_Nature	Population genomics of Bronze Age Eurasia	10.1038/nature14507
RISE512	Andronovo_BA	Russia	Allentoft_2015_Nature	Population genomics of Bronze Age Eurasia	10.1038/nature14507
RISE523	Mezhovskaya_LBA	Russia	Allentoft_2015_Nature	Population genomics of Bronze Age Eurasia	10.1038/nature14507
RISE525	Mezhovskaya_LBA	Russia	Allentoft_2015_Nature	Population genomics of Bronze Age Eurasia	10.1038/nature14507
RISE546	Yamnaya_EBA	Russia	Allentoft_2015_Nature	Population genomics of Bronze Age Eurasia	10.1038/nature14507
RISE547	Yamnaya_EBA	Russia	Allentoft_2015_Nature	Population genomics of Bronze Age Eurasia	10.1038/nature14507
RISE548	Yamnaya_EBA	Russia	Allentoft_2015_Nature	Population genomics of Bronze Age Eurasia	10.1038/nature14507
RISE550	Yamnaya_EBA	Russia	Allentoft_2015_Nature	Population genomics of Bronze Age Eurasia	10.1038/nature14507
RISE552	Yamnaya_EBA	Russia	Allentoft_2015_Nature	Population genomics of Bronze Age Eurasia	10.1038/nature14507
RISE555	Steppe_MBA	Russia	Allentoft_2015_Nature	Population genomics of Bronze Age Eurasia	10.1038/nature14507
RISE559	BBCentralEurope_EBA	Germany	Allentoft_2015_Nature	Population genomics of Bronze Age Eurasia	10.1038/nature14507
RISE560	BBCentralEurope_EBA	Germany	Allentoft_2015_Nature	Population genomics of Bronze Age Eurasia	10.1038/nature14507
RISE562	BBCentralEurope_EBA	Germany	Allentoft_2015_Nature	Population genomics of Bronze Age Eurasia	10.1038/nature14507
RISE563	BBCentralEurope_EBA	Germany	Allentoft_2015_Nature	Population genomics of Bronze Age Eurasia	10.1038/nature14507
RISE564	BBCentralEurope_EBA	Germany	Allentoft_2015_Nature	Population genomics of Bronze Age Eurasia	10.1038/nature14507
RISE566	BBCentralEurope_EBA	CzechRepublic	Allentoft_2015_Nature	Population genomics of Bronze Age Eurasia	10.1038/nature14507
RISE568	Slav_IA	CzechRepublic	Allentoft_2015_Nature	Population genomics of Bronze Age Eurasia	10.1038/nature14507
RISE569	Slav_IA	CzechRepublic	Allentoft_2015_Nature	Population genomics of Bronze Age Eurasia	10.1038/nature14507
RISE577	Unetice_EBA	CzechRepublic	Allentoft_2015_Nature	Population genomics of Bronze Age Eurasia	10.1038/nature14507
RISE586	Unetice_EBA	CzechRepublic	Allentoft_2015_Nature	Population genomics of Bronze Age Eurasia	10.1038/nature14507
RISE61	Denmark_LNBA	Denmark	Allentoft_2015_Nature	Population genomics of Bronze Age Eurasia	10.1038/nature14507
RISE667	Okunevo_EBA	Russia	Allentoft_2015_Nature	Population genomics of Bronze Age Eurasia	10.1038/nature14507
RISE670	Okunevo_EBA	Russia	Allentoft_2015_Nature	Population genomics of Bronze Age Eurasia	10.1038/nature14507
RISE671	Okunevo_EBA	Russia	Allentoft_2015_Nature	Population genomics of Bronze Age Eurasia	10.1038/nature14507
RISE673	Okunevo_EBA	Russia	Allentoft_2015_Nature	Population genomics of Bronze Age Eurasia	10.1038/nature14507
RISE674	Okunevo_EBA	Russia	Allentoft_2015_Nature	Population genomics of Bronze Age Eurasia	10.1038/nature14507
RISE675	Okunevo_EBA	Russia	Allentoft_2015_Nature	Population genomics of Bronze Age Eurasia	10.1038/nature14507
RISE677	Okunevo_EBA	Russia	Allentoft_2015_Nature	Population genomics of Bronze Age Eurasia	10.1038/nature14507
RISE680	Okunevo_EBA	Russia	Allentoft_2015_Nature	Population genomics of Bronze Age Eurasia	10.1038/nature14507
RISE681	Okunevo_EBA	Russia	Allentoft_2015_Nature	Population genomics of Bronze Age Eurasia	10.1038/nature14507
RISE683	Okunevo_EBA	Russia	Allentoft_2015_Nature	Population genomics of Bronze Age Eurasia	10.1038/nature14507
RISE684	Okunevo_EBA	Russia	Allentoft_2015_Nature	Population genomics of Bronze Age Eurasia	10.1038/nature14507
RISE685	Okunevo_EBA	Russia	Allentoft_2015_Nature	Population genomics of Bronze Age Eurasia	10.1038/nature14507
RISE71	Denmark_LNBA	Denmark	Allentoft_2015_Nature	Population genomics of Bronze Age Eurasia	10.1038/nature14507
RISE94	BattleAxe_EBA	Sweden	Allentoft_2015_Nature	Population genomics of Bronze Age Eurasia	10.1038/nature14507
RISE97	Sweden_LNBA	Sweden	Allentoft_2015_Nature	Population genomics of Bronze Age Eurasia	10.1038/nature14507
RISE98	BattleAxe_EBA	Sweden	Allentoft_2015_Nature	Population genomics of Bronze Age Eurasia	10.1038/nature14507
R1014	Italy_CA	Italy	Antonio_2019_Science	Ancient Rome: A genetic crossroads of Europe and the Mediterranean	DOI: 10.1126/science.aay6826
R10	Italy_N	Italy	Antonio_2019_Science	Ancient Rome: A genetic crossroads of Europe and the Mediterranean	DOI: 10.1126/science.aay6826
R11	Italy_M	Italy	Antonio_2019_Science	Ancient Rome: A genetic crossroads of Europe and the Mediterranean	DOI: 10.1126/science.aay6826
R15	Italy_M	Italy	Antonio_2019_Science	Ancient Rome: A genetic crossroads of Europe and the Mediterranean	DOI: 10.1126/science.aay6826
R16	Italy_N	Italy	Antonio_2019_Science	Ancient Rome: A genetic crossroads of Europe and the Mediterranean	DOI: 10.1126/science.aay6826
R17	Italy_N	Italy	Antonio_2019_Science	Ancient Rome: A genetic crossroads of Europe and the Mediterranean	DOI: 10.1126/science.aay6826
R18	Italy_N	Italy	Antonio_2019_Science	Ancient Rome: A genetic crossroads of Europe and the Mediterranean	DOI: 10.1126/science.aay6826
R19	Italy_N	Italy	Antonio_2019_Science	Ancient Rome: A genetic crossroads of Europe and the Mediterranean	DOI: 10.1126/science.aay6826
R2	Italy_N	Italy	Antonio_2019_Science	Ancient Rome: A genetic crossroads of Europe and the Mediterranean	DOI: 10.1126/science.aay6826
R3	Italy_N	Italy	Antonio_2019_Science	Ancient Rome: A genetic crossroads of Europe and the Mediterranean	DOI: 10.1126/science.aay6826
R4	Italy_CA	Italy	Antonio_2019_Science	Ancient Rome: A genetic crossroads of Europe and the Mediterranean	DOI: 10.1126/science.aay6826
R5	Italy_CA	Italy	Antonio_2019_Science	Ancient Rome: A genetic crossroads of Europe and the Mediterranean	DOI: 10.1126/science.aay6826
R6	Italy_N	Italy	Antonio_2019_Science	Ancient Rome: A genetic crossroads of Europe and the Mediterranean	DOI: 10.1126/science.aay6826
R7	Italy_M	Italy	Antonio_2019_Science	Ancient Rome: A genetic crossroads of Europe and the Mediterranean	DOI: 10.1126/science.aay6826
R8	Italy_N	Italy	Antonio_2019_Science	Ancient Rome: A genetic crossroads of Europe and the Mediterranean	DOI: 10.1126/science.aay6826
R9	Italy_N	Italy	Antonio_2019_Science	Ancient Rome: A genetic crossroads of Europe and the Mediterranean	DOI: 10.1126/science.aay6826
Aveline_1	England_N	GreatBritain	Brace_2019_NatEcoEvol	Ancient Genomes Indicate Population Replacement in Early Neolithic Britain	10.1038/s41559-019-0871-9
BurnGround	England_N	GreatBritain	Brace_2019_NatEcoEvol	Ancient Genomes Indicate Population Replacement in Early Neolithic Britain	10.1038/s41559-019-0871-9
Carsington_pasture_1	England_N	GreatBritain	Brace_2019_NatEcoEvol	Ancient Genomes Indicate Population Replacement in Early Neolithic Britain	10.1038/s41559-019-0871-9
CaveHa3_1	England_N	GreatBritain	Brace_2019_NatEcoEvol	Ancient Genomes Indicate Population Replacement in Early Neolithic Britain	10.1038/s41559-019-0871-9
Cheddar_man	Britain_M	GreatBritain	Brace_2019_NatEcoEvol	Ancient Genomes Indicate Population Replacement in Early Neolithic Britain	10.1038/s41559-019-0871-9
Coldrum_1	England_N	GreatBritain	Brace_2019_NatEcoEvol	Ancient Genomes Indicate Population Replacement in Early Neolithic Britain	10.1038/s41559-019-0871-9
Embo_1	Scotland_N	GreatBritain	Brace_2019_NatEcoEvol	Ancient Genomes Indicate Population Replacement in Early Neolithic Britain	10.1038/s41559-019-0871-9
Fussels_Lodge_1	England_N	GreatBritain	Brace_2019_NatEcoEvol	Ancient Genomes Indicate Population Replacement in Early Neolithic Britain	10.1038/s41559-019-0871-9
Fussels_Lodge_2	England_N	GreatBritain	Brace_2019_NatEcoEvol	Ancient Genomes Indicate Population Replacement in Early Neolithic Britain	10.1038/s41559-019-0871-9
Jubilee_cave	England_N	GreatBritain	Brace_2019_NatEcoEvol	Ancient Genomes Indicate Population Replacement in Early Neolithic Britain	10.1038/s41559-019-0871-9
Kelco_cave	England_N	GreatBritain	Brace_2019_NatEcoEvol	Ancient Genomes Indicate Population Replacement in Early Neolithic Britain	10.1038/s41559-019-0871-9
UpperSwell	England_N	GreatBritain	Brace_2019_NatEcoEvol	Ancient Genomes Indicate Population Replacement in Early Neolithic Britain	10.1038/s41559-019-0871-9
WestKennet_1	England_N	GreatBritain	Brace_2019_NatEcoEvol	Ancient Genomes Indicate Population Replacement in Early Neolithic Britain	10.1038/s41559-019-0871-9
AH1	Zagros_EN	Iran	Broushaki_2016_Science	Early Neolithic genomes from the eastern Fertile Crescent	DOI: 10.1126/science.aaf7943
AH2	Zagros_EN	Iran	Broushaki_2016_Science	Early Neolithic genomes from the eastern Fertile Crescent	DOI: 10.1126/science.aaf7943
AH4	Zagros_EN	Iran	Broushaki_2016_Science	Early Neolithic genomes from the eastern Fertile Crescent	DOI: 10.1126/science.aaf7943
WC1	Zagros_EN	Iran	Broushaki_2016_Science	Early Neolithic genomes from the eastern Fertile Crescent	DOI: 10.1126/science.aaf7943
Ballynahatty	Ireland_N	Ireland	Cassidy_2015_PNAS	Neolithic and Bronze Age migration to Ireland and establishment of the insular Atlantic genome	https://doi.org/10.1073/pnas.1518445113
Rathlin1	Ireland_BA	Ireland	Cassidy_2015_PNAS	Neolithic and Bronze Age migration to Ireland and establishment of the insular Atlantic genome	https://doi.org/10.1073/pnas.1518445113
Rathlin2	Ireland_BA	Ireland	Cassidy_2015_PNAS	Neolithic and Bronze Age migration to Ireland and establishment of the insular Atlantic genome	https://doi.org/10.1073/pnas.1518445113
Rathlin3	Ireland_BA	Ireland	Cassidy_2015_PNAS	Neolithic and Bronze Age migration to Ireland and establishment of the insular Atlantic genome	https://doi.org/10.1073/pnas.1518445113
RISE662	Okunevo_EBA	Russia	Damgaard 2018 Science	The first horse herders and the impact of early Bronze Age steppe expansions into Asia	DOI: 10.1126/science.aar7711
RISE664	Okunevo_EBA	Russia	Damgaard 2018 Science	The first horse herders and the impact of early Bronze Age steppe expansions into Asia	DOI: 10.1126/science.aar7711
RISE718	Okunevo_EBA	Russia	Damgaard 2018 Science	The first horse herders and the impact of early Bronze Age steppe expansions into Asia	DOI: 10.1126/science.aar7711
RISE719	Okunevo_EBA	Russia	Damgaard 2018 Science	The first horse herders and the impact of early Bronze Age steppe expansions into Asia	DOI: 10.1126/science.aar7711
BOT14	Botai_EBA	Kazakhstan	Damgaard_2018_Science	The first horse herders and the impact of early Bronze Age steppe expansions into Asia	DOI: 10.1126/science.aar7711
BOT15	Botai_EBA	Kazakhstan	Damgaard_2018_Science	The first horse herders and the impact of early Bronze Age steppe expansions into Asia	DOI: 10.1126/science.aar7711
BOT2016	Botai_EBA	Kazakhstan	Damgaard_2018_Science	The first horse herders and the impact of early Bronze Age steppe expansions into Asia	DOI: 10.1126/science.aar7711
DA379	Namazga_CA	Turkmenistan	Damgaard_2018_Science	The first horse herders and the impact of early Bronze Age steppe expansions into Asia	DOI: 10.1126/science.aar7711
DA380	Namazga_CA	Turkmenistan	Damgaard_2018_Science	The first horse herders and the impact of early Bronze Age steppe expansions into Asia	DOI: 10.1126/science.aar7711
DA381	Namazga_CA	Turkmenistan	Damgaard_2018_Science	The first horse herders and the impact of early Bronze Age steppe expansions into Asia	DOI: 10.1126/science.aar7711
DA383	Namazga_CA	Turkmenistan	Damgaard_2018_Science	The first horse herders and the impact of early Bronze Age steppe expansions into Asia	DOI: 10.1126/science.aar7711
EBA1	CentralSteppe_EBA	Kazakhstan	Damgaard_2018_Science	The first horse herders and the impact of early Bronze Age steppe expansions into Asia	DOI: 10.1126/science.aar7711
EBA2	CentralSteppe_EBA	Kazakhstan	Damgaard_2018_Science	The first horse herders and the impact of early Bronze Age steppe expansions into Asia	DOI: 10.1126/science.aar7711
MA2200	Anatolia_MLBA	Turkey	Damgaard_2018_Science	The first horse herders and the impact of early Bronze Age steppe expansions into Asia	DOI: 10.1126/science.aar7711
MA2203	Anatolia_MLBA	Turkey	Damgaard_2018_Science	The first horse herders and the impact of early Bronze Age steppe expansions into Asia	DOI: 10.1126/science.aar7711
MA2205	Anatolia_MLBA	Turkey	Damgaard_2018_Science	The first horse herders and the impact of early Bronze Age steppe expansions into Asia	DOI: 10.1126/science.aar7711
MA2206	Anatolia_MLBA	Turkey	Damgaard_2018_Science	The first horse herders and the impact of early Bronze Age steppe expansions into Asia	DOI: 10.1126/science.aar7711
MA2208	Anatolia_MLBA	Turkey	Damgaard_2018_Science	The first horse herders and the impact of early Bronze Age steppe expansions into Asia	DOI: 10.1126/science.aar7711
MA2210	Anatolia_EBA	Turkey	Damgaard_2018_Science	The first horse herders and the impact of early Bronze Age steppe expansions into Asia	DOI: 10.1126/science.aar7711
MA2212	Anatolia_EBA	Turkey	Damgaard_2018_Science	The first horse herders and the impact of early Bronze Age steppe expansions into Asia	DOI: 10.1126/science.aar7711
MA2213	Anatolia_EBA	Turkey	Damgaard_2018_Science	The first horse herders and the impact of early Bronze Age steppe expansions into Asia	DOI: 10.1126/science.aar7711
Sidelkino	EasternHG_M	Russia	Damgaard_2018_Science	The first horse herders and the impact of early Bronze Age steppe expansions into Asia	DOI: 10.1126/science.aar7711
Yamnaya	Yamnaya_EBA	Kazakhstan	Damgaard_2018_Science	The first horse herders and the impact of early Bronze Age steppe expansions into Asia	DOI: 10.1126/science.aar7711
PL_N17	Poland_BA	Poland	Fernandes_2018_SciRep	A genomic Neolithic time transect of hunter-farmer admixture in central Poland	https://doi.org/10.1038/s41598-018-33067-w
PL_N18	PolandTRB_MN	Poland	Fernandes_2018_SciRep	A genomic Neolithic time transect of hunter-farmer admixture in central Poland	https://doi.org/10.1038/s41598-018-33067-w
PL_N19	PolandTRB_MN	Poland	Fernandes_2018_SciRep	A genomic Neolithic time transect of hunter-farmer admixture in central Poland	https://doi.org/10.1038/s41598-018-33067-w
PL_N20	PolandTRB_MN	Poland	Fernandes_2018_SciRep	A genomic Neolithic time transect of hunter-farmer admixture in central Poland	https://doi.org/10.1038/s41598-018-33067-w
PL_N22	PolandHG_M	Poland	Fernandes_2018_SciRep	A genomic Neolithic time transect of hunter-farmer admixture in central Poland	https://doi.org/10.1038/s41598-018-33067-w
PL_N25	Poland_MN	Poland	Fernandes_2018_SciRep	A genomic Neolithic time transect of hunter-farmer admixture in central Poland	https://doi.org/10.1038/s41598-018-33067-w
PL_N26	Poland_MN	Poland	Fernandes_2018_SciRep	A genomic Neolithic time transect of hunter-farmer admixture in central Poland	https://doi.org/10.1038/s41598-018-33067-w
PL_N27	Poland_MN	Poland	Fernandes_2018_SciRep	A genomic Neolithic time transect of hunter-farmer admixture in central Poland	https://doi.org/10.1038/s41598-018-33067-w
PL_N28	Poland_MN	Poland	Fernandes_2018_SciRep	A genomic Neolithic time transect of hunter-farmer admixture in central Poland	https://doi.org/10.1038/s41598-018-33067-w
PL_N31	Poland_MN	Poland	Fernandes_2018_SciRep	A genomic Neolithic time transect of hunter-farmer admixture in central Poland	https://doi.org/10.1038/s41598-018-33067-w
PL_N36	Poland_MN	Poland	Fernandes_2018_SciRep	A genomic Neolithic time transect of hunter-farmer admixture in central Poland	https://doi.org/10.1038/s41598-018-33067-w
PL_N38	GAC_LN	Poland	Fernandes_2018_SciRep	A genomic Neolithic time transect of hunter-farmer admixture in central Poland	https://doi.org/10.1038/s41598-018-33067-w
PL_N44	CordedWare_EBA	Poland	Fernandes_2018_SciRep	A genomic Neolithic time transect of hunter-farmer admixture in central Poland	https://doi.org/10.1038/s41598-018-33067-w
PL_N45	CordedWare_EBA	Poland	Fernandes_2018_SciRep	A genomic Neolithic time transect of hunter-farmer admixture in central Poland	https://doi.org/10.1038/s41598-018-33067-w
PL_N47	CordedWare_EBA	Poland	Fernandes_2018_SciRep	A genomic Neolithic time transect of hunter-farmer admixture in central Poland	https://doi.org/10.1038/s41598-018-33067-w
PL_N49	CordedWare_EBA	Poland	Fernandes_2018_SciRep	A genomic Neolithic time transect of hunter-farmer admixture in central Poland	https://doi.org/10.1038/s41598-018-33067-w
Karelia	EasternHG_M	Russia	Fu_2014_Nature	Genome sequence of a 45,000-year-old modern human from western Siberia	https://doi.org/10.1038/nature13810
BR1	Hungary_BA	Hungary	Gamba_2014_NatComm	Genome flux and stasis in a five millennium transect of European prehistory	https://doi.org/10.1038/ncomms6257
BR2	Hungary_BA	Hungary	Gamba_2014_NatComm	Genome flux and stasis in a five millennium transect of European prehistory	https://doi.org/10.1038/ncomms6257
CO1	Hungary_CA	Hungary	Gamba_2014_NatComm	Genome flux and stasis in a five millennium transect of European prehistory	https://doi.org/10.1038/ncomms6257
KO1	SEEurHG_M	Hungary	Gamba_2014_NatComm	Genome flux and stasis in a five millennium transect of European prehistory	https://doi.org/10.1038/ncomms6257
KO2	Hungary_EN	Hungary	Gamba_2014_NatComm	Genome flux and stasis in a five millennium transect of European prehistory	https://doi.org/10.1038/ncomms6257
NE1	Hungary_MN	Hungary	Gamba_2014_NatComm	Genome flux and stasis in a five millennium transect of European prehistory	https://doi.org/10.1038/ncomms6257
NE2	Hungary_MN	Hungary	Gamba_2014_NatComm	Genome flux and stasis in a five millennium transect of European prehistory	https://doi.org/10.1038/ncomms6257
NE3	Hungary_MN	Hungary	Gamba_2014_NatComm	Genome flux and stasis in a five millennium transect of European prehistory	https://doi.org/10.1038/ncomms6257
NE4	Hungary_MN	Hungary	Gamba_2014_NatComm	Genome flux and stasis in a five millennium transect of European prehistory	https://doi.org/10.1038/ncomms6257
NE5	Hungary_MN	Hungary	Gamba_2014_NatComm	Genome flux and stasis in a five millennium transect of European prehistory	https://doi.org/10.1038/ncomms6257
NE6	Hungary_MN	Hungary	Gamba_2014_NatComm	Genome flux and stasis in a five millennium transect of European prehistory	https://doi.org/10.1038/ncomms6257
NE7	Hungary_LN	Hungary	Gamba_2014_NatComm	Genome flux and stasis in a five millennium transect of European prehistory	https://doi.org/10.1038/ncomms6257
Canes1	Iberia_M	Spain	Gonzáles-Fortes_2017_CurrBiol	Paleogenomic Evidence for Multi-generational Mixing between Neolithic Farmers and Mesolithic Hunter-Gatherers in the Lower Danube Basin	https://doi.org/10.1016/j.cub.2017.05.023
Chan	Iberia_M	Spain	Gonzáles-Fortes_2017_CurrBiol	Paleogenomic Evidence for Multi-generational Mixing between Neolithic Farmers and Mesolithic Hunter-Gatherers in the Lower Danube Basin	https://doi.org/10.1016/j.cub.2017.05.023
GB1	Balkans_CA	Romania	Gonzáles-Fortes_2017_CurrBiol	Paleogenomic Evidence for Multi-generational Mixing between Neolithic Farmers and Mesolithic Hunter-Gatherers in the Lower Danube Basin	https://doi.org/10.1016/j.cub.2017.05.023
OC1	IronGatesRomania_M	Romania	Gonzáles-Fortes_2017_CurrBiol	Paleogenomic Evidence for Multi-generational Mixing between Neolithic Farmers and Mesolithic Hunter-Gatherers in the Lower Danube Basin	https://doi.org/10.1016/j.cub.2017.05.023
SC1	IronGatesRomania_M	Romania	Gonzáles-Fortes_2017_CurrBiol	Paleogenomic Evidence for Multi-generational Mixing between Neolithic Farmers and Mesolithic Hunter-Gatherers in the Lower Danube Basin	https://doi.org/10.1016/j.cub.2017.05.023
SC2	IronGatesRomania_M	Romania	Gonzáles-Fortes_2017_CurrBiol	Paleogenomic Evidence for Multi-generational Mixing between Neolithic Farmers and Mesolithic Hunter-Gatherers in the Lower Danube Basin	https://doi.org/10.1016/j.cub.2017.05.023
H22	NorwayHG_M	Norway	Gunther_2018_PlosBiol	Population genomics of Mesolithic Scandinavia: Investigating early postglacial migration routes and high-latitude adaptation	https://doi.org/10.1371/journal.pbio.2003703
H26	NorwayHG_M	Norway	Gunther_2018_PlosBiol	Population genomics of Mesolithic Scandinavia: Investigating early postglacial migration routes and high-latitude adaptation	https://doi.org/10.1371/journal.pbio.2003703
sbj001	BalticIslandHG_M	Sweden	Gunther_2018_PlosBiol	Population genomics of Mesolithic Scandinavia: Investigating early postglacial migration routes and high-latitude adaptation	https://doi.org/10.1371/journal.pbio.2003703
sf12	BalticIslandHG_M	Sweden	Gunther_2018_PlosBiol	Population genomics of Mesolithic Scandinavia: Investigating early postglacial migration routes and high-latitude adaptation	https://doi.org/10.1371/journal.pbio.2003703
sf9	BalticIslandHG_M	Sweden	Gunther_2018_PlosBiol	Population genomics of Mesolithic Scandinavia: Investigating early postglacial migration routes and high-latitude adaptation	https://doi.org/10.1371/journal.pbio.2003703
stg001	NorwayHG_M	Norway	Gunther_2018_PlosBiol	Population genomics of Mesolithic Scandinavia: Investigating early postglacial migration routes and high-latitude adaptation	https://doi.org/10.1371/journal.pbio.2003703
ERS1790729	Levant_BA	Lebanon	Haber 2017_AJHG	Continuity and Admixture in the Last Five Millennia of Levantine History from Ancient Canaanite and Present-Day Lebanese Genome Sequences	https://doi.org/10.1016/j.ajhg.2017.06.013
ERS1790730	Levant_BA	Lebanon	Haber 2017_AJHG	Continuity and Admixture in the Last Five Millennia of Levantine History from Ancient Canaanite and Present-Day Lebanese Genome Sequences	https://doi.org/10.1016/j.ajhg.2017.06.013
ERS1790731	Levant_BA	Lebanon	Haber 2017_AJHG	Continuity and Admixture in the Last Five Millennia of Levantine History from Ancient Canaanite and Present-Day Lebanese Genome Sequences	https://doi.org/10.1016/j.ajhg.2017.06.013
ERS1790732	Levant_BA	Lebanon	Haber 2017_AJHG	Continuity and Admixture in the Last Five Millennia of Levantine History from Ancient Canaanite and Present-Day Lebanese Genome Sequences	https://doi.org/10.1016/j.ajhg.2017.06.013
ERS1790733	Levant_BA	Lebanon	Haber 2017_AJHG	Continuity and Admixture in the Last Five Millennia of Levantine History from Ancient Canaanite and Present-Day Lebanese Genome Sequences	https://doi.org/10.1016/j.ajhg.2017.06.013
Bar31	Barcin_EN	Turkey	Hofmanova_2016_PNAS	Early farmers from across Europe directly descended from Neolithic Aegeans	https://doi.org/10.1073/pnas.1523951113
Bar8	Barcin_EN	Turkey	Hofmanova_2016_PNAS	Early farmers from across Europe directly descended from Neolithic Aegeans	https://doi.org/10.1073/pnas.1523951113
Klei10	Greece_N	Greece	Hofmanova_2016_PNAS	Early farmers from across Europe directly descended from Neolithic Aegeans	https://doi.org/10.1073/pnas.1523951113
Pal7	Greece_N	Greece	Hofmanova_2016_PNAS	Early farmers from across Europe directly descended from Neolithic Aegeans	https://doi.org/10.1073/pnas.1523951113
Rev5	Greece_N	Greece	Hofmanova_2016_PNAS	Early farmers from across Europe directly descended from Neolithic Aegeans	https://doi.org/10.1073/pnas.1523951113
KK1	CaucasusHG_M	Georgia	Jones_2015_NatComm	Upper Palaeolithic genomes reveal deep roots of modern Eurasians	10.1038/ncomms9912 (2015)
Latvia_HG1	Baltic_M	Latvia	Jones_2017_CurrBiol	The Neolithic Transition in the Baltic Was Not Driven by Admixture with Early European Farmers	10.1016/j.cub.2016.12.060
Latvia_HG2	Baltic_EN	Latvia	Jones_2017_CurrBiol	The Neolithic Transition in the Baltic Was Not Driven by Admixture with Early European Farmers	10.1016/j.cub.2016.12.060
Latvia_HG3	Baltic_EN	Latvia	Jones_2017_CurrBiol	The Neolithic Transition in the Baltic Was Not Driven by Admixture with Early European Farmers	10.1016/j.cub.2016.12.060
Latvia_LN1	CordedWare_EBA	Latvia	Jones_2017_CurrBiol	The Neolithic Transition in the Baltic Was Not Driven by Admixture with Early European Farmers	10.1016/j.cub.2016.12.060
Latvia_MN1	Baltic_MN	Latvia	Jones_2017_CurrBiol	The Neolithic Transition in the Baltic Was Not Driven by Admixture with Early European Farmers	10.1016/j.cub.2016.12.060
Latvia_MN2	Baltic_MN	Latvia	Jones_2017_CurrBiol	The Neolithic Transition in the Baltic Was Not Driven by Admixture with Early European Farmers	10.1016/j.cub.2016.12.060
Ukraine_HG1	Ucraine_M	Ucraine	Jones_2017_CurrBiol	The Neolithic Transition in the Baltic Was Not Driven by Admixture with Early European Farmers	10.1016/j.cub.2016.12.060
Ukraine_N1	Ucraine_N	Ucraine	Jones_2017_CurrBiol	The Neolithic Transition in the Baltic Was Not Driven by Admixture with Early European Farmers	10.1016/j.cub.2016.12.060
Bon002	Boncuklu_EN	Turkey	Kilinc_2016_CurrBiol	The Neolithic Transition in the Baltic Was Not Driven by Admixture with Early European Farmers	10.1016/j.cub.2016.12.060
Bon004	Boncuklu_EN	Turkey	Kilinc_2016_CurrBiol	The Neolithic Transition in the Baltic Was Not Driven by Admixture with Early European Farmers	10.1016/j.cub.2016.12.060
Tep002	Tepecic_EN	Turkey	Kilinc_2016_CurrBiol	The Neolithic Transition in the Baltic Was Not Driven by Admixture with Early European Farmers	10.1016/j.cub.2016.12.060
Tep003	Tepecic_EN	Turkey	Kilinc_2016_CurrBiol	The Neolithic Transition in the Baltic Was Not Driven by Admixture with Early European Farmers	10.1016/j.cub.2016.12.060
Tep004	Tepecic_EN	Turkey	Kilinc_2016_CurrBiol	The Neolithic Transition in the Baltic Was Not Driven by Admixture with Early European Farmers	10.1016/j.cub.2016.12.060
Tep006	Tepecic_EN	Turkey	Kilinc_2016_CurrBiol	The Neolithic Transition in the Baltic Was Not Driven by Admixture with Early European Farmers	10.1016/j.cub.2016.12.060
Loschbour	Loschbour_M	Luxembourg	Lazaridis_2014_Nature	Ancient human genomes suggest three ancestral populations for present-day Europeans	https://doi.org/10.1038/nature13673
Motala1	Motala_M	Sweden	Lazaridis_2014_Nature	Ancient human genomes suggest three ancestral populations for present-day Europeans	https://doi.org/10.1038/nature13673
Motala12	Motala_M	Sweden	Lazaridis_2014_Nature	Ancient human genomes suggest three ancestral populations for present-day Europeans	https://doi.org/10.1038/nature13673
Motala2	Motala_M	Sweden	Lazaridis_2014_Nature	Ancient human genomes suggest three ancestral populations for present-day Europeans	https://doi.org/10.1038/nature13673
Motala4	Motala_M	Sweden	Lazaridis_2014_Nature	Ancient human genomes suggest three ancestral populations for present-day Europeans	https://doi.org/10.1038/nature13673
Stuttgart	LBK_EN	Germany	Lazaridis_2014_Nature	Ancient human genomes suggest three ancestral populations for present-day Europeans	https://doi.org/10.1038/nature13673
ber1M	BattleAxe_EBA	Sweden	Malmström_2019_ProcRSocB	The genomic ancestry of the Scandinavian Battle Axe Culture people and their relation to the broader Corded Ware horizon	https://doi.org/10.1098/rspb.2019.1528
ber2F	BattleAxe_EBA	Sweden	Malmström_2019_ProcRSocB	The genomic ancestry of the Scandinavian Battle Axe Culture people and their relation to the broader Corded Ware horizon	https://doi.org/10.1098/rspb.2019.1528
oll007	Sweden_LNBA	Sweden	Malmström_2019_ProcRSocB	The genomic ancestry of the Scandinavian Battle Axe Culture people and their relation to the broader Corded Ware horizon	https://doi.org/10.1098/rspb.2019.1528
oll009	Sweden_LNBA	Sweden	Malmström_2019_ProcRSocB	The genomic ancestry of the Scandinavian Battle Axe Culture people and their relation to the broader Corded Ware horizon	https://doi.org/10.1098/rspb.2019.1528
oll010	Sweden_LNBA	Sweden	Malmström_2019_ProcRSocB	The genomic ancestry of the Scandinavian Battle Axe Culture people and their relation to the broader Corded Ware horizon	https://doi.org/10.1098/rspb.2019.1528
poz44	CordedWare_EBA	Poland	Malmström_2019_ProcRSocB	The genomic ancestry of the Scandinavian Battle Axe Culture people and their relation to the broader Corded Ware horizon	https://doi.org/10.1098/rspb.2019.1528
poz81	CordedWare_EBA	Poland	Malmström_2019_ProcRSocB	The genomic ancestry of the Scandinavian Battle Axe Culture people and their relation to the broader Corded Ware horizon	https://doi.org/10.1098/rspb.2019.1528
ros005	TRB_EN	Sweden	Malmström_2019_ProcRSocB	The genomic ancestry of the Scandinavian Battle Axe Culture people and their relation to the broader Corded Ware horizon	https://doi.org/10.1098/rspb.2019.1528
ros3	TRB_EN	Sweden	Malmström_2019_ProcRSocB	The genomic ancestry of the Scandinavian Battle Axe Culture people and their relation to the broader Corded Ware horizon	https://doi.org/10.1098/rspb.2019.1528
VK214	Denmark_LNBA	Denmark	Margaryan_2019_biorxiv	Population genomics of the Viking world	https://doi.org/10.1101/703405
CabecoArruda117B	Iberia_CA	Portugal	Martiniano_2017_PlosGen	The population genomics of archaeological transition in west Iberia: Investigation of ancient substructure using imputation and haplotype-based methods	10.1371/journal.pgen.1006852
CabecoArruda122A	Iberia_CA	Portugal	Martiniano_2017_PlosGen	The population genomics of archaeological transition in west Iberia: Investigation of ancient substructure using imputation and haplotype-based methods	10.1371/journal.pgen.1006852
CovaMoura364	Iberia_CA	Portugal	Martiniano_2017_PlosGen	The population genomics of archaeological transition in west Iberia: Investigation of ancient substructure using imputation and haplotype-based methods	10.1371/journal.pgen.1006852
CovaMoura9B	Iberia_CA	Portugal	Martiniano_2017_PlosGen	The population genomics of archaeological transition in west Iberia: Investigation of ancient substructure using imputation and haplotype-based methods	10.1371/journal.pgen.1006852
DolmenAnsiao96B	Iberia_CA	Portugal	Martiniano_2017_PlosGen	The population genomics of archaeological transition in west Iberia: Investigation of ancient substructure using imputation and haplotype-based methods	10.1371/journal.pgen.1006852
LugarCanto41	Iberia_MN	Portugal	Martiniano_2017_PlosGen	The population genomics of archaeological transition in west Iberia: Investigation of ancient substructure using imputation and haplotype-based methods	10.1371/journal.pgen.1006852
LugarCanto42	Iberia_MN	Portugal	Martiniano_2017_PlosGen	The population genomics of archaeological transition in west Iberia: Investigation of ancient substructure using imputation and haplotype-based methods	10.1371/journal.pgen.1006852
LugarCanto44	Iberia_MN	Portugal	Martiniano_2017_PlosGen	The population genomics of archaeological transition in west Iberia: Investigation of ancient substructure using imputation and haplotype-based methods	10.1371/journal.pgen.1006852
MonteGato104	Iberia_BA	Portugal	Martiniano_2017_PlosGen	The population genomics of archaeological transition in west Iberia: Investigation of ancient substructure using imputation and haplotype-based methods	10.1371/journal.pgen.1006852
TV32032extra	Iberia_BA	Portugal	Martiniano_2017_PlosGen	The population genomics of archaeological transition in west Iberia: Investigation of ancient substructure using imputation and haplotype-based methods	10.1371/journal.pgen.1006852
TV3831	Iberia_BA	Portugal	Martiniano_2017_PlosGen	The population genomics of archaeological transition in west Iberia: Investigation of ancient substructure using imputation and haplotype-based methods	10.1371/journal.pgen.1006852
ValeOuro10207	Iberia_BA	Portugal	Martiniano_2017_PlosGen	The population genomics of archaeological transition in west Iberia: Investigation of ancient substructure using imputation and haplotype-based methods	10.1371/journal.pgen.1006852
Kunila2	CordedWare_EBA	Estonia	Mittnik_2018_NatComm	The genetic prehistory of the Baltic Sea region	https://doi.org/10.1038/s41467-018-02825-9
Brana	Iberia_M	Spain	Olalde_2014_Nature	Derived immune and ancestral pigmentation alleles in a 7,000-year-old Mesolithic European	https://doi.org/10.1038/nature12960
CB13	Iberia_EN	Spain	Olalde_2015_MBE	A Common Genetic Origin for Early Farmers from Mediterranean Cardial and Central European LBK Cultures.	10.1093/molbev/msv181
Kumtepe006	Kumtepe_EN	Turkey	Omrak_2015_CurrBiol	The Demographic Development of the First Farmers in Anatolia	https://doi.org/10.1016/j.cub.2016.07.057
Ardu1	CordedWare_EBA	Estonia	Saag_2019_CurrBiol	The Arrival of Siberian Ancestry Connecting the Eastern Baltic to Uralic Speakers Further East	doi: 10.1016/j.cub.2019.04.026
Ardu2	CordedWare_EBA	Estonia	Saag_2019_CurrBiol	The Arrival of Siberian Ancestry Connecting the Eastern Baltic to Uralic Speakers Further East	doi: 10.1016/j.cub.2019.04.026
Kudrukula3	Baltic_MN	Estonia	Saag_2019_CurrBiol	The Arrival of Siberian Ancestry Connecting the Eastern Baltic to Uralic Speakers Further East	doi: 10.1016/j.cub.2019.04.026
Kunila1	CordedWare_EBA	Estonia	Saag_2019_CurrBiol	The Arrival of Siberian Ancestry Connecting the Eastern Baltic to Uralic Speakers Further East	doi: 10.1016/j.cub.2019.04.026
0LS11	Baltic_BA	Estonia	Saag_2019_CurrBiol	The Arrival of Siberian Ancestry Connecting the Eastern Baltic to Uralic Speakers Further East	doi: 10.1016/j.cub.2019.04.026
V14	Baltic_BA	Estonia	Saag_2019_CurrBiol	The Arrival of Siberian Ancestry Connecting the Eastern Baltic to Uralic Speakers Further East	doi: 10.1016/j.cub.2019.04.026
V16	Baltic_BA	Estonia	Saag_2019_CurrBiol	The Arrival of Siberian Ancestry Connecting the Eastern Baltic to Uralic Speakers Further East	doi: 10.1016/j.cub.2019.04.026
V9	Baltic_BA	Estonia	Saag_2019_CurrBiol	The Arrival of Siberian Ancestry Connecting the Eastern Baltic to Uralic Speakers Further East	doi: 10.1016/j.cub.2019.04.026
X08	Baltic_BA	Estonia	Saag_2019_CurrBiol	The Arrival of Siberian Ancestry Connecting the Eastern Baltic to Uralic Speakers Further East	doi: 10.1016/j.cub.2019.04.026
X10	Baltic_BA	Estonia	Saag_2019_CurrBiol	The Arrival of Siberian Ancestry Connecting the Eastern Baltic to Uralic Speakers Further East	doi: 10.1016/j.cub.2019.04.026
X11	Baltic_BA	Estonia	Saag_2019_CurrBiol	The Arrival of Siberian Ancestry Connecting the Eastern Baltic to Uralic Speakers Further East	doi: 10.1016/j.cub.2019.04.026
X14	Baltic_BA	Estonia	Saag_2019_CurrBiol	The Arrival of Siberian Ancestry Connecting the Eastern Baltic to Uralic Speakers Further East	doi: 10.1016/j.cub.2019.04.026
X15	Baltic_BA	Estonia	Saag_2019_CurrBiol	The Arrival of Siberian Ancestry Connecting the Eastern Baltic to Uralic Speakers Further East	doi: 10.1016/j.cub.2019.04.026
X17	Baltic_BA	Estonia	Saag_2019_CurrBiol	The Arrival of Siberian Ancestry Connecting the Eastern Baltic to Uralic Speakers Further East	doi: 10.1016/j.cub.2019.04.026
X20	Baltic_BA	Estonia	Saag_2019_CurrBiol	The Arrival of Siberian Ancestry Connecting the Eastern Baltic to Uralic Speakers Further East	doi: 10.1016/j.cub.2019.04.026
ans003	TRB_EN	Sweden	SanchezQuinto_2019_PNAS	Megalithic tombs in western and northern Neolithic Europe were linked to a kindred society	https://doi.org/10.1073/pnas.1818037116
ans005	TRB_EN	Sweden	SanchezQuinto_2019_PNAS	Megalithic tombs in western and northern Neolithic Europe were linked to a kindred society	https://doi.org/10.1073/pnas.1818037116
ans008	TRB_EN	Sweden	SanchezQuinto_2019_PNAS	Megalithic tombs in western and northern Neolithic Europe were linked to a kindred society	https://doi.org/10.1073/pnas.1818037116
ans016	TRB_EN	Sweden	SanchezQuinto_2019_PNAS	Megalithic tombs in western and northern Neolithic Europe were linked to a kindred society	https://doi.org/10.1073/pnas.1818037116
ans017	TRB_EN	Sweden	SanchezQuinto_2019_PNAS	Megalithic tombs in western and northern Neolithic Europe were linked to a kindred society	https://doi.org/10.1073/pnas.1818037116
bal004	Scotland_N	GreatBritain	SanchezQuinto_2019_PNAS	Megalithic tombs in western and northern Neolithic Europe were linked to a kindred society	https://doi.org/10.1073/pnas.1818037116
kol2	Czech_MN	CzechRepublic	SanchezQuinto_2019_PNAS	Megalithic tombs in western and northern Neolithic Europe were linked to a kindred society	https://doi.org/10.1073/pnas.1818037116
kol6	Czech_MN	CzechRepublic	SanchezQuinto_2019_PNAS	Megalithic tombs in western and northern Neolithic Europe were linked to a kindred society	https://doi.org/10.1073/pnas.1818037116
lai001	Scotland_N	GreatBritain	SanchezQuinto_2019_PNAS	Megalithic tombs in western and northern Neolithic Europe were linked to a kindred society	https://doi.org/10.1073/pnas.1818037116
mid001	Scotland_N	GreatBritain	SanchezQuinto_2019_PNAS	Megalithic tombs in western and northern Neolithic Europe were linked to a kindred society	https://doi.org/10.1073/pnas.1818037116
mid002	Scotland_N	GreatBritain	SanchezQuinto_2019_PNAS	Megalithic tombs in western and northern Neolithic Europe were linked to a kindred society	https://doi.org/10.1073/pnas.1818037116
prs002	Ireland_N	Ireland	SanchezQuinto_2019_PNAS	Megalithic tombs in western and northern Neolithic Europe were linked to a kindred society	https://doi.org/10.1073/pnas.1818037116
prs003	Ireland_N	Ireland	SanchezQuinto_2019_PNAS	Megalithic tombs in western and northern Neolithic Europe were linked to a kindred society	https://doi.org/10.1073/pnas.1818037116
prs006	Ireland_N	Ireland	SanchezQuinto_2019_PNAS	Megalithic tombs in western and northern Neolithic Europe were linked to a kindred society	https://doi.org/10.1073/pnas.1818037116
prs009	Ireland_N	Ireland	SanchezQuinto_2019_PNAS	Megalithic tombs in western and northern Neolithic Europe were linked to a kindred society	https://doi.org/10.1073/pnas.1818037116
prs010	Ireland_N	Ireland	SanchezQuinto_2019_PNAS	Megalithic tombs in western and northern Neolithic Europe were linked to a kindred society	https://doi.org/10.1073/pnas.1818037116
prs012	Ireland_N	Ireland	SanchezQuinto_2019_PNAS	Megalithic tombs in western and northern Neolithic Europe were linked to a kindred society	https://doi.org/10.1073/pnas.1818037116
prs013	Ireland_N	Ireland	SanchezQuinto_2019_PNAS	Megalithic tombs in western and northern Neolithic Europe were linked to a kindred society	https://doi.org/10.1073/pnas.1818037116
prs016	Ireland_N	Ireland	SanchezQuinto_2019_PNAS	Megalithic tombs in western and northern Neolithic Europe were linked to a kindred society	https://doi.org/10.1073/pnas.1818037116
prs018	Ireland_N	Ireland	SanchezQuinto_2019_PNAS	Megalithic tombs in western and northern Neolithic Europe were linked to a kindred society	https://doi.org/10.1073/pnas.1818037116
RISE1159	GAC_LN	Poland	Schroeder_2019_PNAS	Unraveling ancestry, kinship, and violence in a Late Neolithic mass grave	https://doi.org/10.1073/pnas.1820210116
RISE1161	GAC_LN	Poland	Schroeder_2019_PNAS	Unraveling ancestry, kinship, and violence in a Late Neolithic mass grave	https://doi.org/10.1073/pnas.1820210116
RISE1166	GAC_LN	Poland	Schroeder_2019_PNAS	Unraveling ancestry, kinship, and violence in a Late Neolithic mass grave	https://doi.org/10.1073/pnas.1820210116
RISE1168	GAC_LN	Poland	Schroeder_2019_PNAS	Unraveling ancestry, kinship, and violence in a Late Neolithic mass grave	https://doi.org/10.1073/pnas.1820210116
RISE1170	GAC_LN	Poland	Schroeder_2019_PNAS	Unraveling ancestry, kinship, and violence in a Late Neolithic mass grave	https://doi.org/10.1073/pnas.1820210116
RISE1241	GAC_LN	Poland	Schroeder_2019_PNAS	Unraveling ancestry, kinship, and violence in a Late Neolithic mass grave	https://doi.org/10.1073/pnas.1820210116
RISE1246	GAC_LN	Poland	Schroeder_2019_PNAS	Unraveling ancestry, kinship, and violence in a Late Neolithic mass grave	https://doi.org/10.1073/pnas.1820210116
RISE1248	GAC_LN	Poland	Schroeder_2019_PNAS	Unraveling ancestry, kinship, and violence in a Late Neolithic mass grave	https://doi.org/10.1073/pnas.1820210116
RISE1249	GAC_LN	Poland	Schroeder_2019_PNAS	Unraveling ancestry, kinship, and violence in a Late Neolithic mass grave	https://doi.org/10.1073/pnas.1820210116
RISE1250	GAC_LN	Poland	Schroeder_2019_PNAS	Unraveling ancestry, kinship, and violence in a Late Neolithic mass grave	https://doi.org/10.1073/pnas.1820210116
RISE1252	GAC_LN	Poland	Schroeder_2019_PNAS	Unraveling ancestry, kinship, and violence in a Late Neolithic mass grave	https://doi.org/10.1073/pnas.1820210116
RISE1254	GAC_LN	Poland	Schroeder_2019_PNAS	Unraveling ancestry, kinship, and violence in a Late Neolithic mass grave	https://doi.org/10.1073/pnas.1820210116
Ajv52	PWC_EN	Sweden	Skoglund_2014_Science	Genomic Diversity and Admixture Differs for Stone-Age Scandinavian Foragers and Farmers	DOI: 10.1126/science.1253448
ajv54	PWC_EN	Sweden	Skoglund_2014_Science	Genomic Diversity and Admixture Differs for Stone-Age Scandinavian Foragers and Farmers	DOI: 10.1126/science.1253448
Ajv58	PWC_EN	Sweden	Skoglund_2014_Science	Genomic Diversity and Admixture Differs for Stone-Age Scandinavian Foragers and Farmers	DOI: 10.1126/science.1253448
Ajv70	PWC_EN	Sweden	Skoglund_2014_Science	Genomic Diversity and Admixture Differs for Stone-Age Scandinavian Foragers and Farmers	DOI: 10.1126/science.1253448
Gok2	TRB_EN	Sweden	Skoglund_2014_Science	Genomic Diversity and Admixture Differs for Stone-Age Scandinavian Foragers and Farmers	DOI: 10.1126/science.1253448
Gjerrild1	Gjerrild_BA	Denmark	THIS STUDY
Gjerrild5	Gjerrild_BA	Denmark	THIS STUDY
Gjerrild8	Gjerrild_BA	Denmark	THIS STUDY
atp002	Iberia_CA	Spain	Valdiosera_2018_PNAS	Four millennia of Iberian biomolecular prehistory illustrate the impact of prehistoric migrations at the far end of Eurasia	https://doi.org/10.1073/pnas.1717762115
atp016	Iberia_CA	Spain	Valdiosera_2018_PNAS	Four millennia of Iberian biomolecular prehistory illustrate the impact of prehistoric migrations at the far end of Eurasia	https://doi.org/10.1073/pnas.1717762115
atp12-1420	Iberia_CA	Spain	Valdiosera_2018_PNAS	Four millennia of Iberian biomolecular prehistory illustrate the impact of prehistoric migrations at the far end of Eurasia	https://doi.org/10.1073/pnas.1717762115
esp005	Iberia_BA	Spain	Valdiosera_2018_PNAS	Four millennia of Iberian biomolecular prehistory illustrate the impact of prehistoric migrations at the far end of Eurasia	https://doi.org/10.1073/pnas.1717762115
mur	Iberia_EN	Spain	Valdiosera_2018_PNAS	Four millennia of Iberian biomolecular prehistory illustrate the impact of prehistoric migrations at the far end of Eurasia	https://doi.org/10.1073/pnas.1717762115
pir001	Iberia_BA	Spain	Valdiosera_2018_PNAS	Four millennia of Iberian biomolecular prehistory illustrate the impact of prehistoric migrations at the far end of Eurasia	https://doi.org/10.1073/pnas.1717762115
por002	Iberia_CA	Spain	Valdiosera_2018_PNAS	Four millennia of Iberian biomolecular prehistory illustrate the impact of prehistoric migrations at the far end of Eurasia	https://doi.org/10.1073/pnas.1717762115
por004	Iberia_CA	Spain	Valdiosera_2018_PNAS	Four millennia of Iberian biomolecular prehistory illustrate the impact of prehistoric migrations at the far end of Eurasia	https://doi.org/10.1073/pnas.1717762115
